# Supplementary material for: Perylene diimide-based sensors for multiple analyte sensing (Fe2+/H2S/ dopamine and Hg2+/Fe2+): cell imaging and INH, XOR, and encoder logic
Source: Royal Society of Chemistry journal article supplement (doi:10.1039/d3ay00290j), 2023-01-01
Supplement: d3ay00290j1.pdf [file d3ay00290j1.pdf]

## Perylene diimide-based sensors for multiple analyte sensing ( $\text{Fe}^{2+}/\text{H}_2\text{S}$ / dopamine and $\text{Hg}^{2+}/\text{Fe}^{2+}$ ): Cell imaging and INH, XOR, Encoder logic

Navdeep Kaur<sup>a</sup>, Rasdeep Kour<sup>b</sup>, Satwinderjeet Kaur<sup>b</sup> and Prabhpreet Singh<sup>\*a</sup>

<sup>a</sup>Department of Chemistry, UGC Centre for Advanced Studies-II, Guru Nanak Dev University, Amritsar 143001 (Pb.)-India, E-mail: [prabhpreet.chem@gndu.ac.in](mailto:prabhpreet.chem@gndu.ac.in); M: +91 8427101534

<sup>b</sup>Department of Botanical and Environmental Sciences, Guru Nanak Dev University, Amritsar 143001 Pb.)-India.

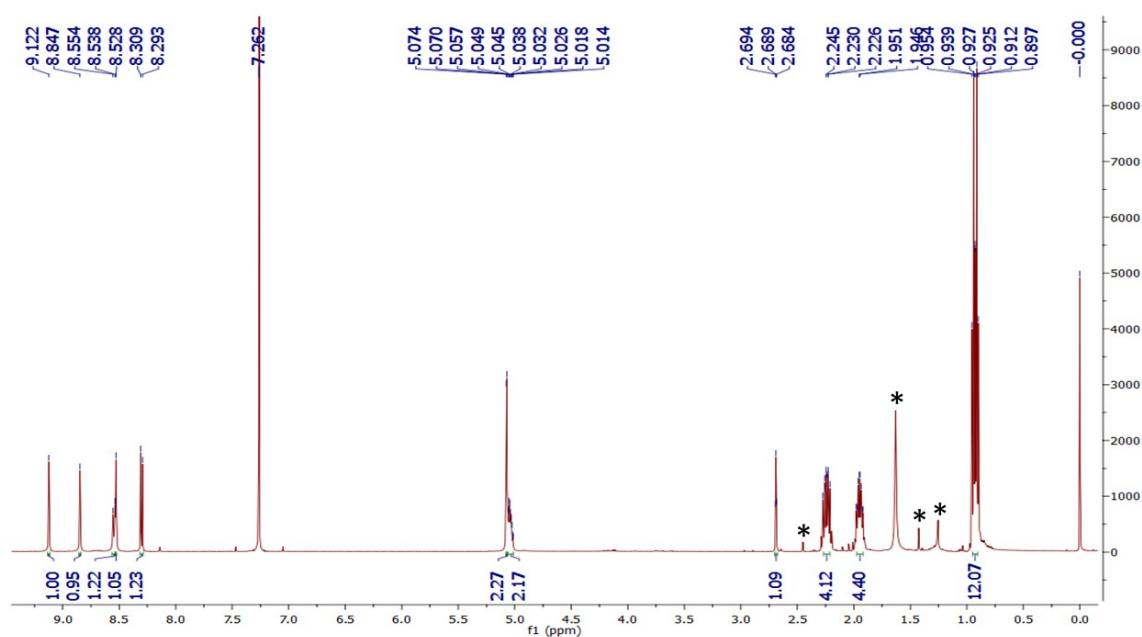

**Figure S1a:**  $^1\text{H}$  NMR spectrum of DNP.

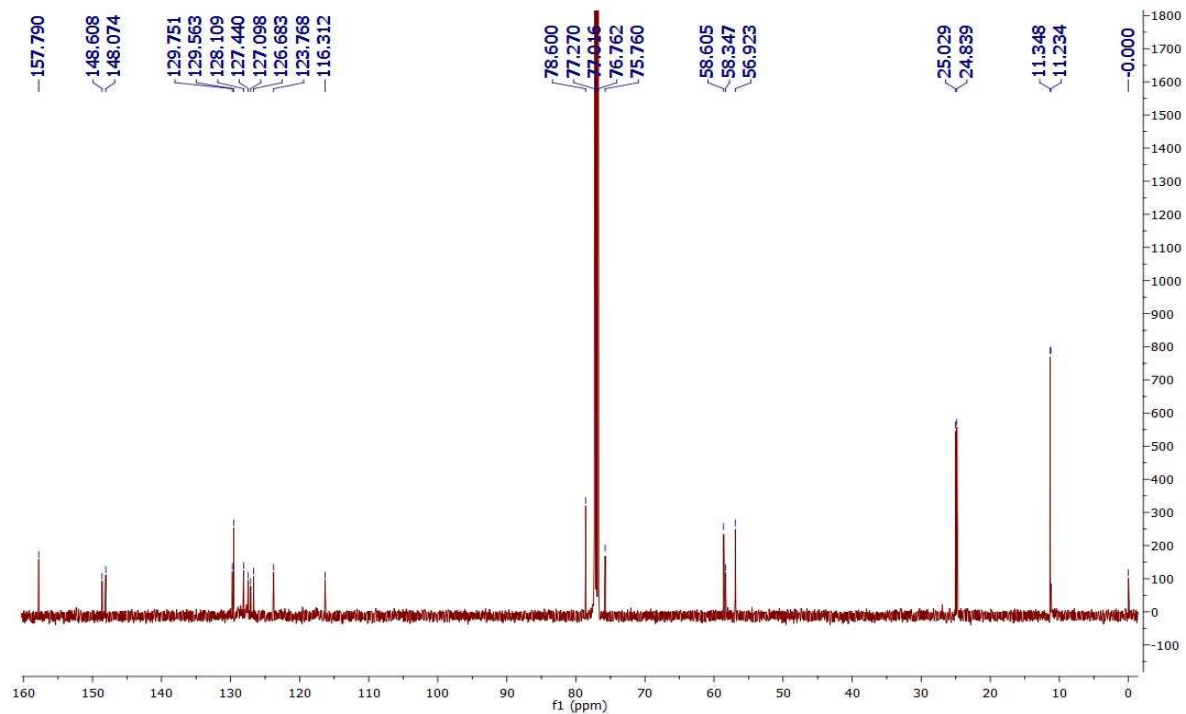

**Figure S1b:**  $^{13}\text{C}$  NMR spectrum of DNP.

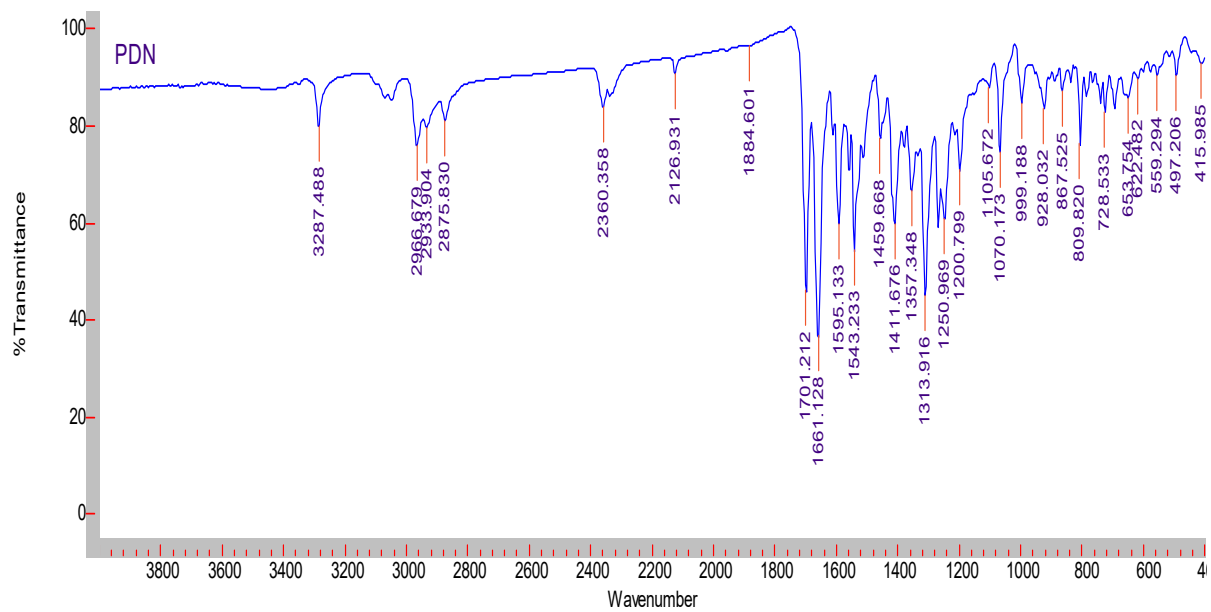

**Figure S1c:** IR spectrum of DNP.

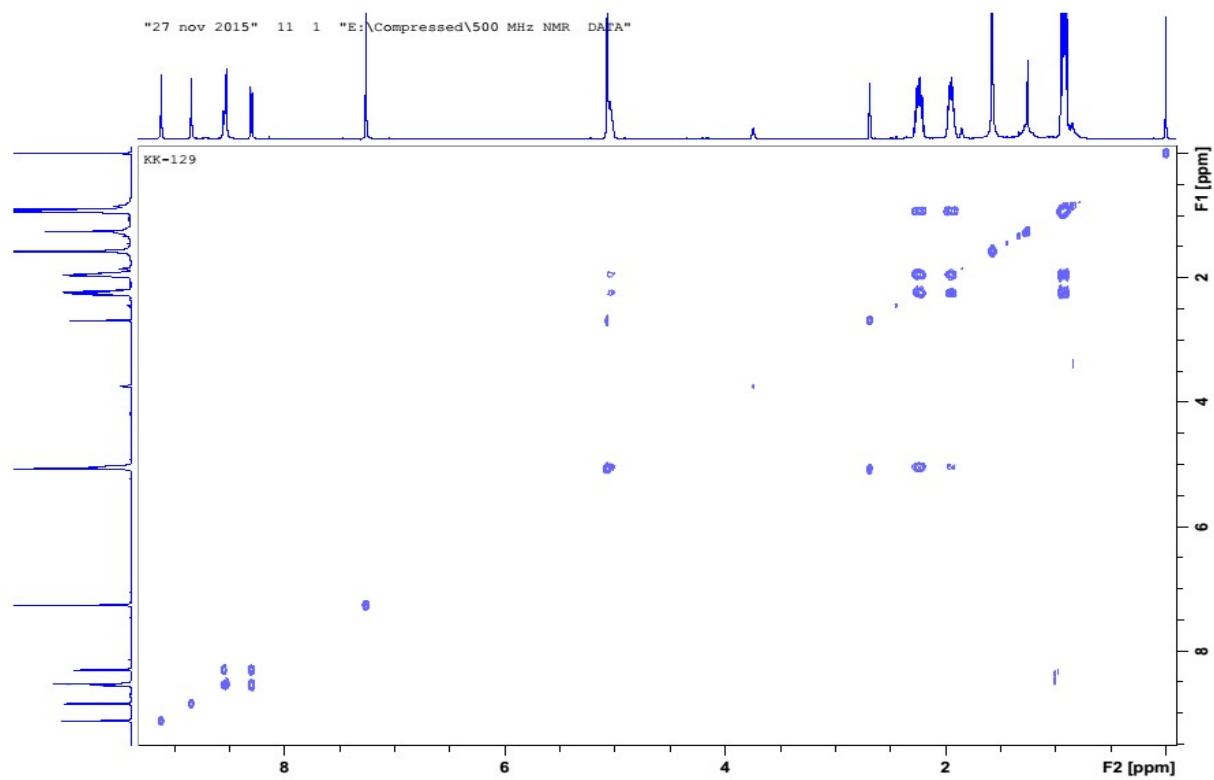

Figure S1d:  $^1\text{H}$ - $^1\text{H}$  COSY data of DNP.

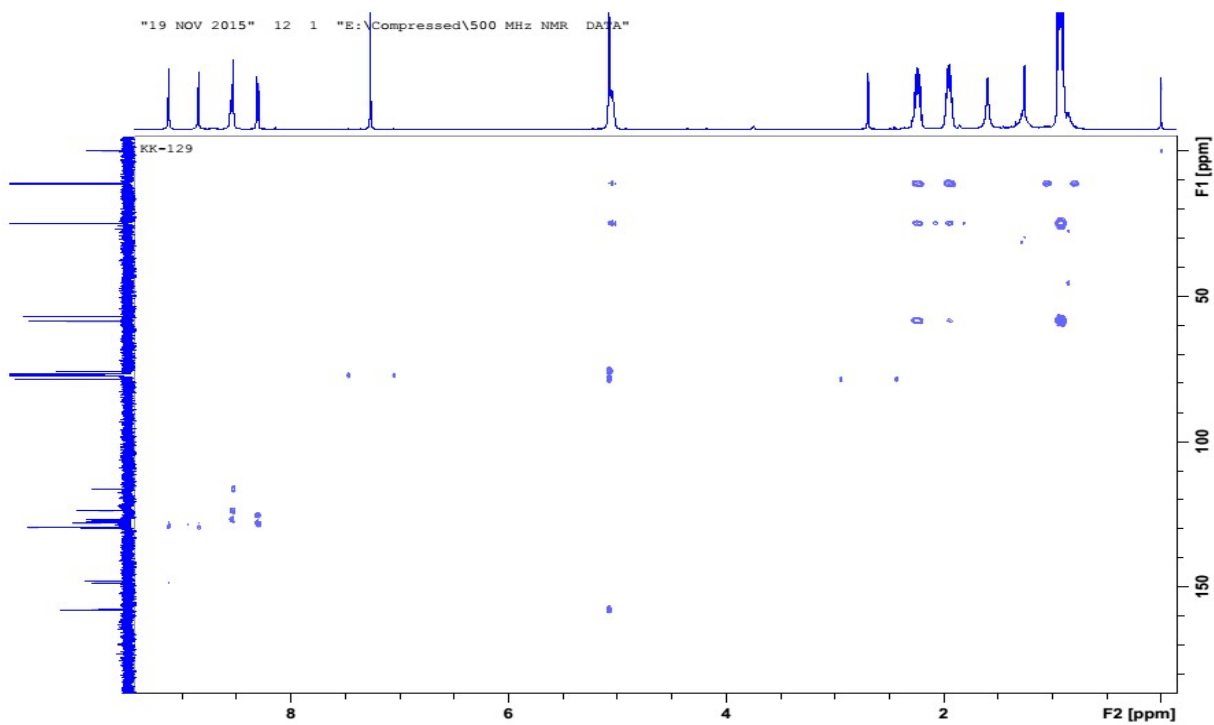

Figure S1e: HMBC data of DNP.

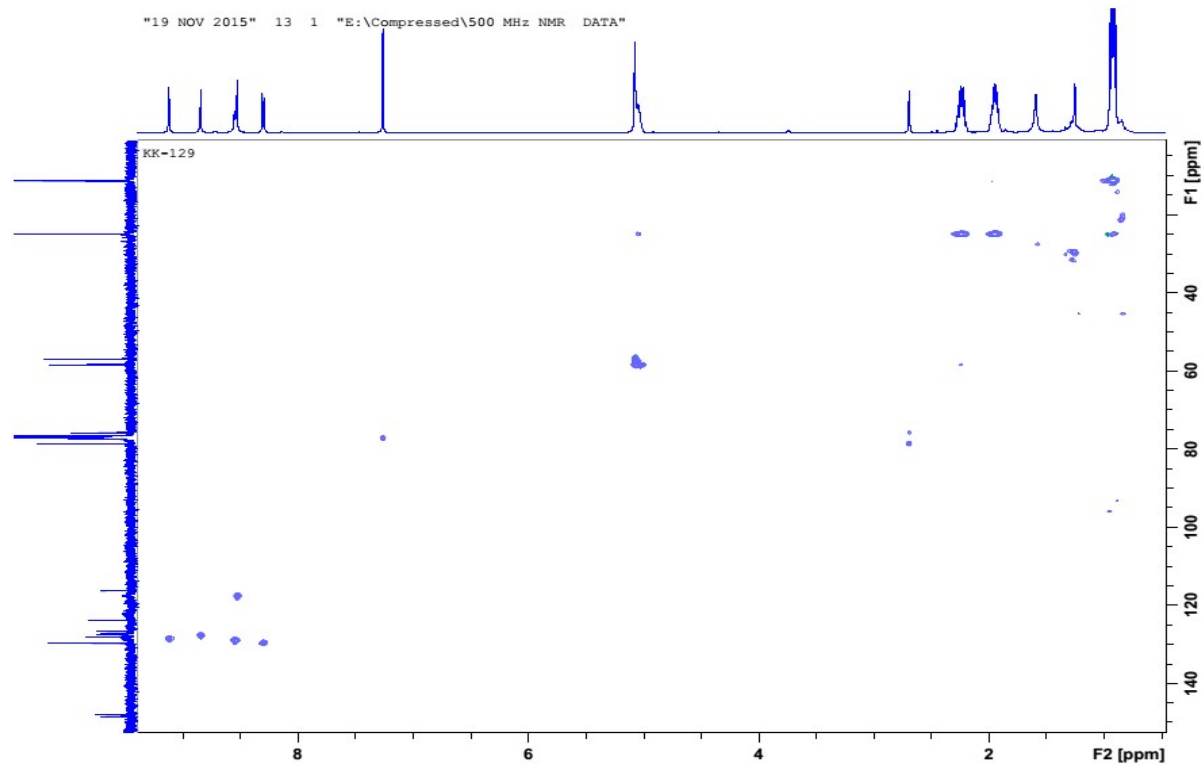

Figure S1f: HSQC data of DNP.

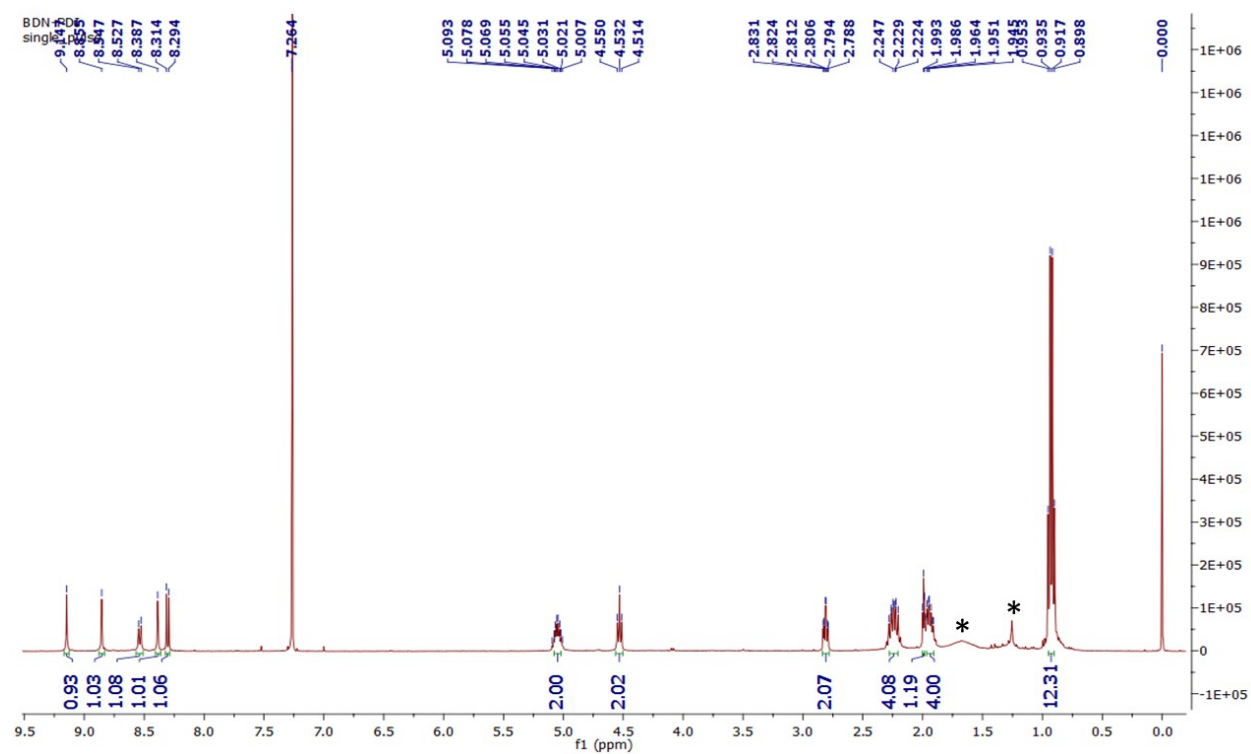

Figure S2a:  $^1\text{H}$  NMR spectrum of DNB.

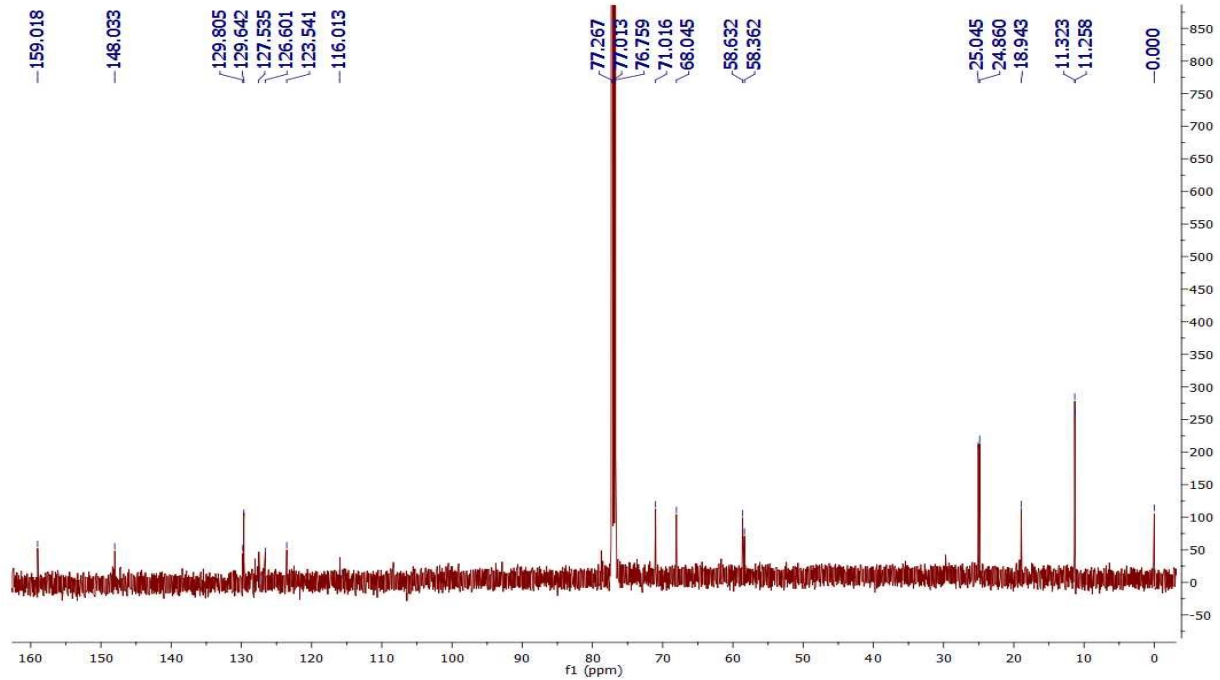

Figure S2b: <sup>13</sup>C NMR spectrum of DNB.

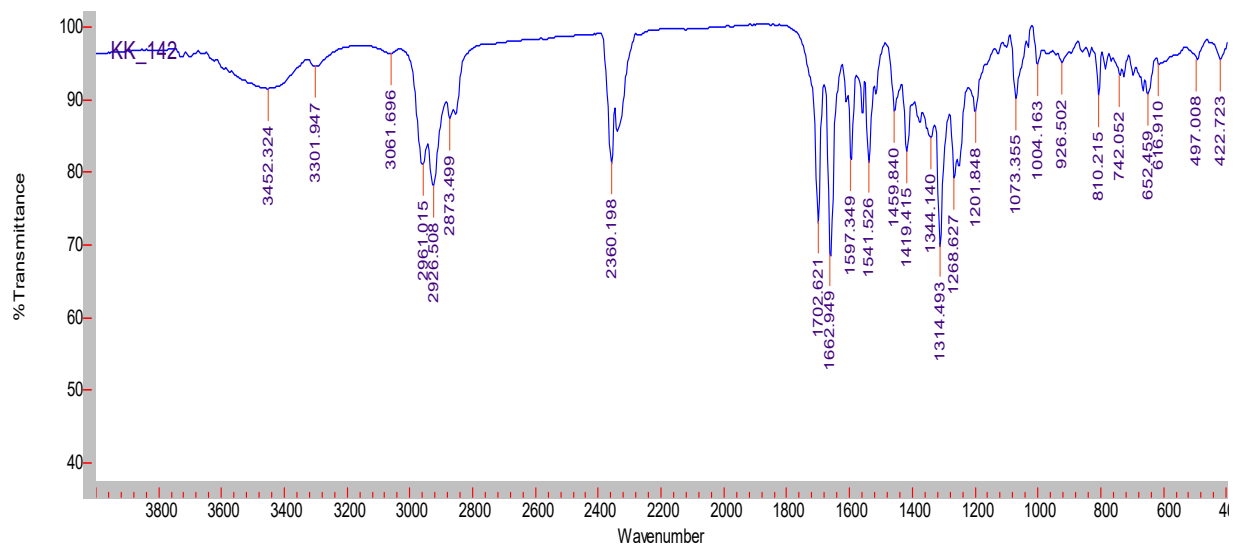

Figure S2c: IR spectrum of DNB.

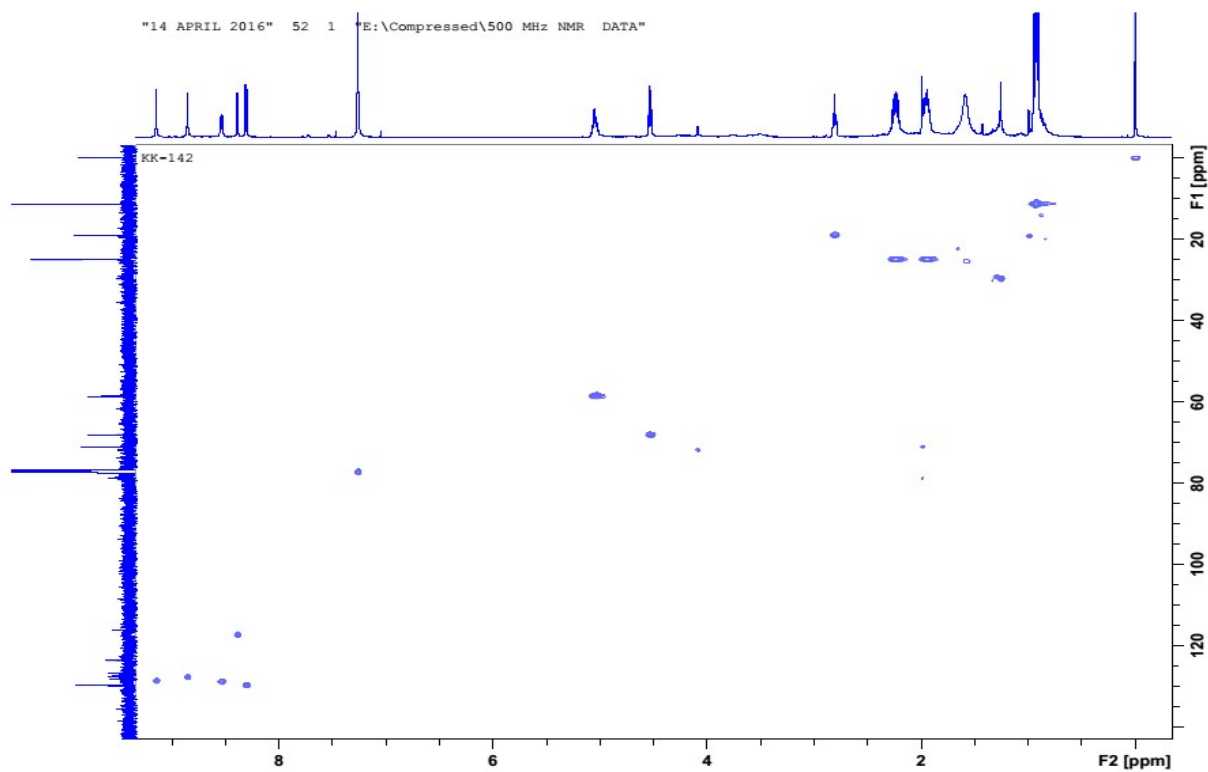

**Figure S2d:** HSQC spectrum of DNB.

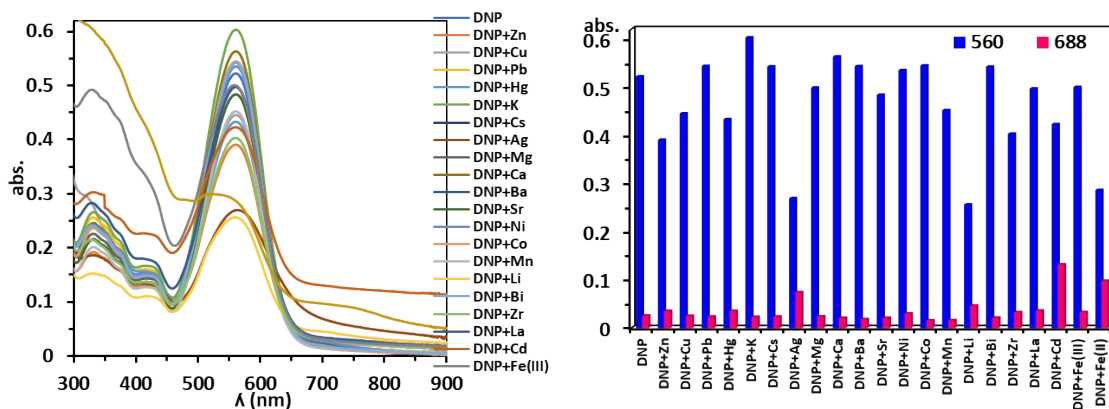

**Figure S3.** The absorbance spectrum of DNB (10  $\mu$ M, 3 mL, CH<sub>3</sub>CN-HEPES, 1:1, v/v, pH 7.2) in the presence of various anions and absorbance bar graph to investigate the competitive changes in DNB (10  $\mu$ M) at 560 nm and 688 nm in presence of various metal ions.

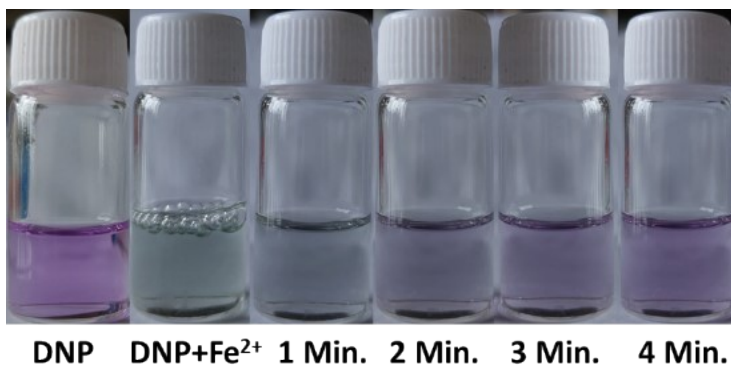

**Figure S4:** Photographs of naked eye color change in **DNP** upon addition of Fe<sup>2+</sup> ions and reversal of green color back to violet with continuous increasing interval of time.

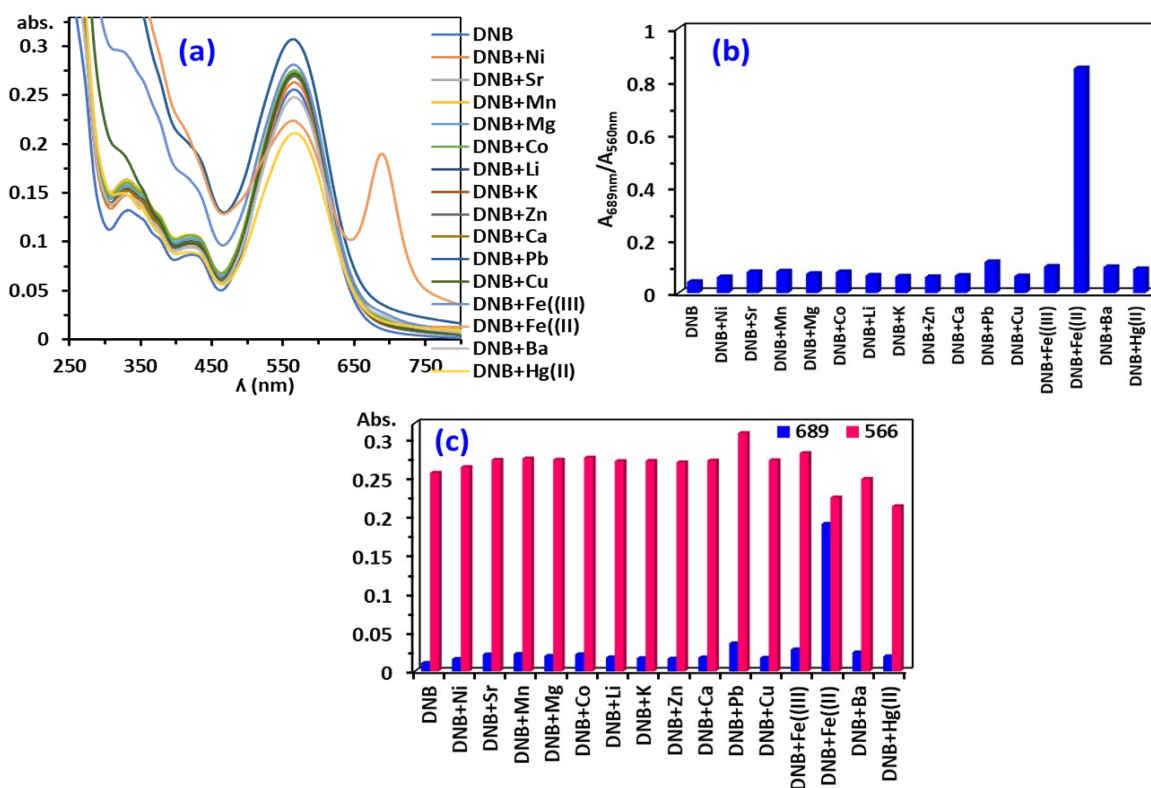

**Figure S5.** (a) The absorbance spectrum of **DNB** (10 μM, CH<sub>3</sub>CN-HEPES, 1:1, v/v, pH 7.2) in the presence of various anions; (b) Ratiometric ( $A_{689nm}/A_{566nm}$ ) and (c) absorbance plot to investigate the competitive changes in **DNB** (10 μM) with other anions.

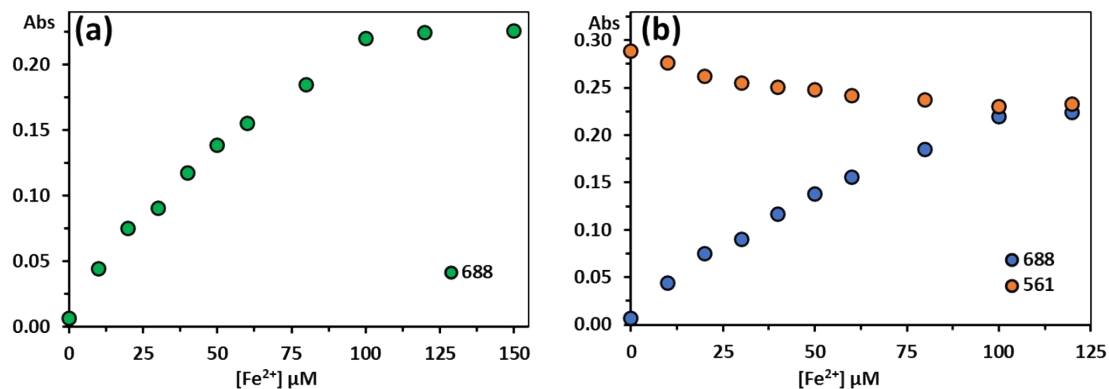

**Figure S6:** Plot of absorbance intensity of **DNP** (10  $\mu\text{M}$ ) (a) at 688 nm and (b) 688 nm and 561 nm upon addition of  $\text{Fe}^{2+}$  (0–150  $\mu\text{M}$ ) recorded in 50% HEPES buffer– $\text{CH}_3\text{CN}$  (pH 7.2) solution.

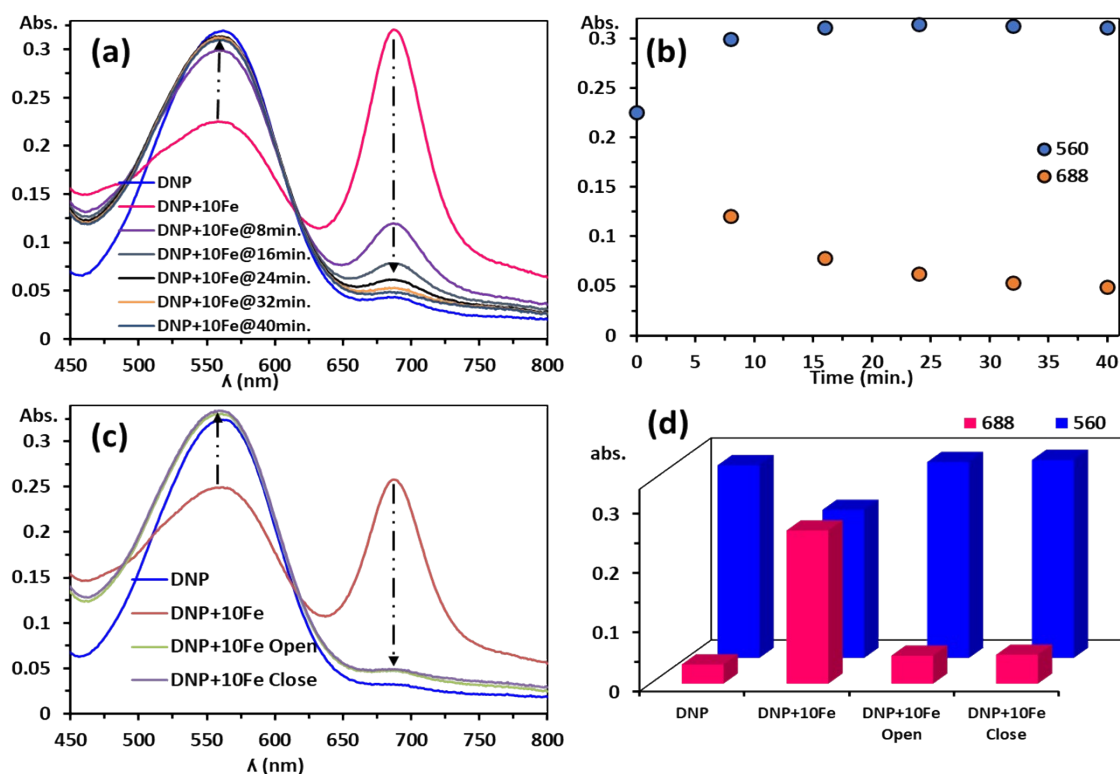

**Figure S7:** (a) Absorbance spectra and (b) Plot of absorbance intensity of **DNP** (10  $\mu\text{M}$ ) +  $\text{Fe}^{2+}$  (100  $\mu\text{M}$ ) assay recorded after regular interval of time; (c-d) effect of  $\text{O}_2$  on **DNP** (10  $\mu\text{M}$ ) +  $\text{Fe}^{2+}$  (100  $\mu\text{M}$ ) assay when the vials kept open and closed. All readings have been recorded in 50% HEPES buffer– $\text{CH}_3\text{CN}$  (pH 7.2) solution.



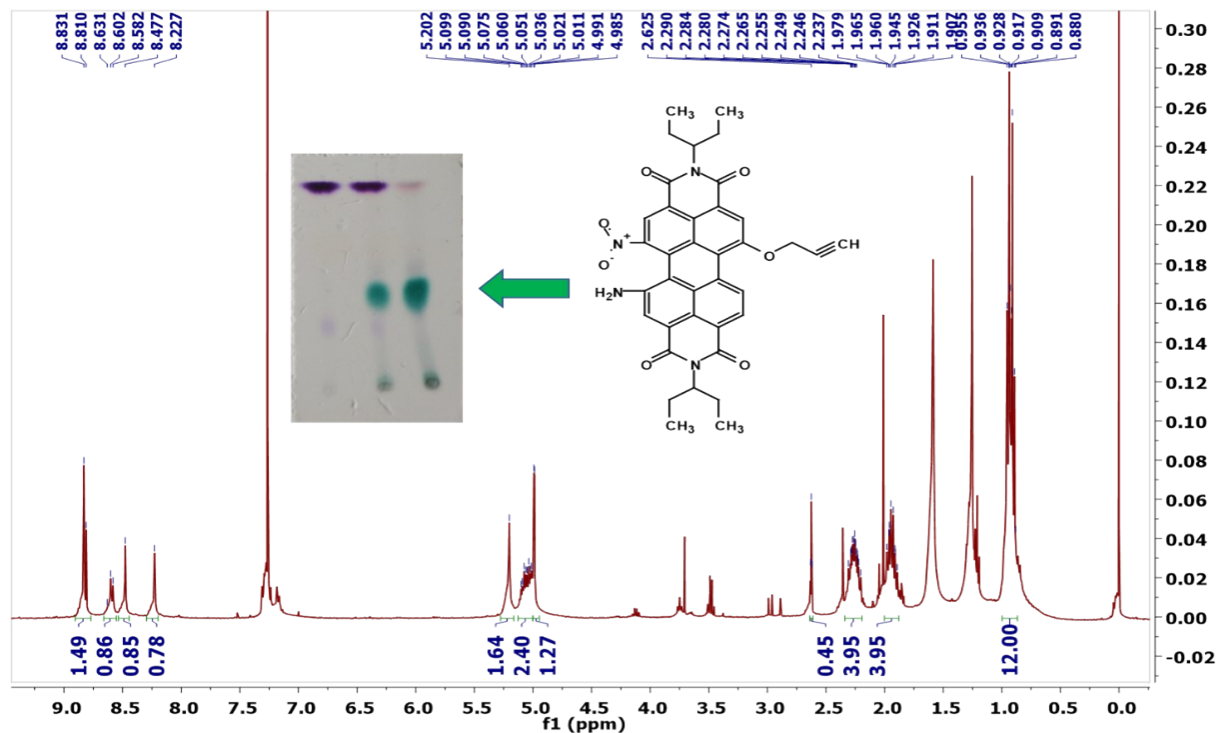

**Figure S8.** The proton NMR spectrum of green product (reduction of one  $-\text{NO}_2$  group to  $-\text{NH}_2$ ) isolated from model reaction.

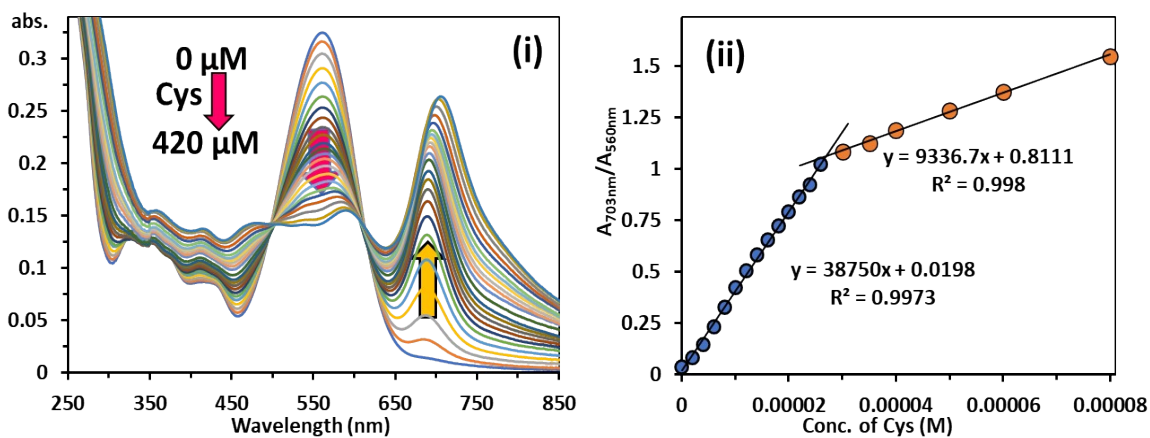

**Figure S9:** (i) Absorbance spectra of **DNP** ( $10 \mu\text{M}$ ) recorded in 50% HEPES buffer- $\text{CH}_3\text{CN}$  (pH 7.2) solution on addition of Cysteine (Cys) in concentration range of 0- $420 \mu\text{M}$ ; (ii) Ratiometric plot of absorbance intensity at  $A_{703\text{nm}}/A_{560\text{nm}}$  against different concentrations of Cys.

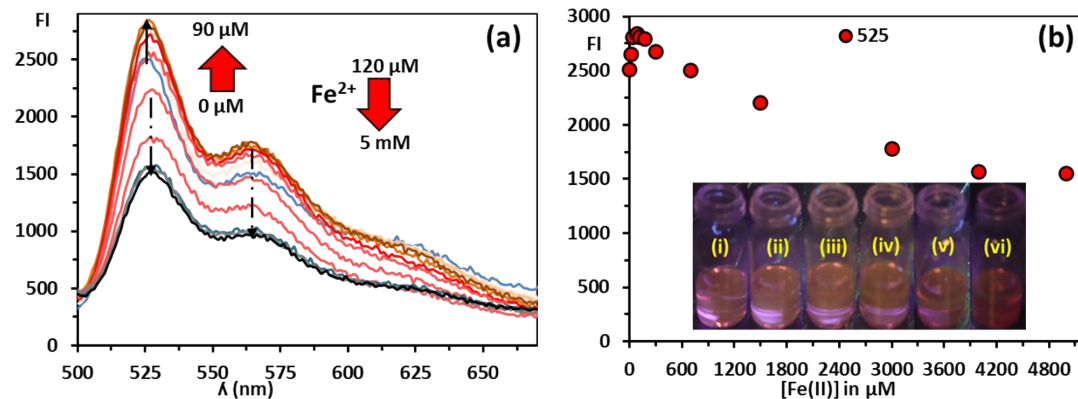

**Figure S10.** (a) Emission spectra of **DNP** (10  $\mu\text{M}$ ) recorded in HEPES buffer- $\text{CH}_3\text{CN}$  (1:1, v/v, pH 7.2) upon addition of different concentrations of  $\text{Fe}^{2+}$  ions; (b) Plots of fluorescence intensity for **DNP** in the presence of various concentrations of  $\text{Fe}^{2+}$  ions; (Inset) Photographs of **DNP** (20  $\mu\text{M}$ ) under 365 nm UV illumination in the presence of (i) 0  $\mu\text{M}$  (ii) 80  $\mu\text{M}$  (iii) 140  $\mu\text{M}$ , (iv) 200  $\mu\text{M}$ , (v) 400  $\mu\text{M}$ , (vi) 1 mM, concentrations of  $\text{Fe}^{2+}$  ions.

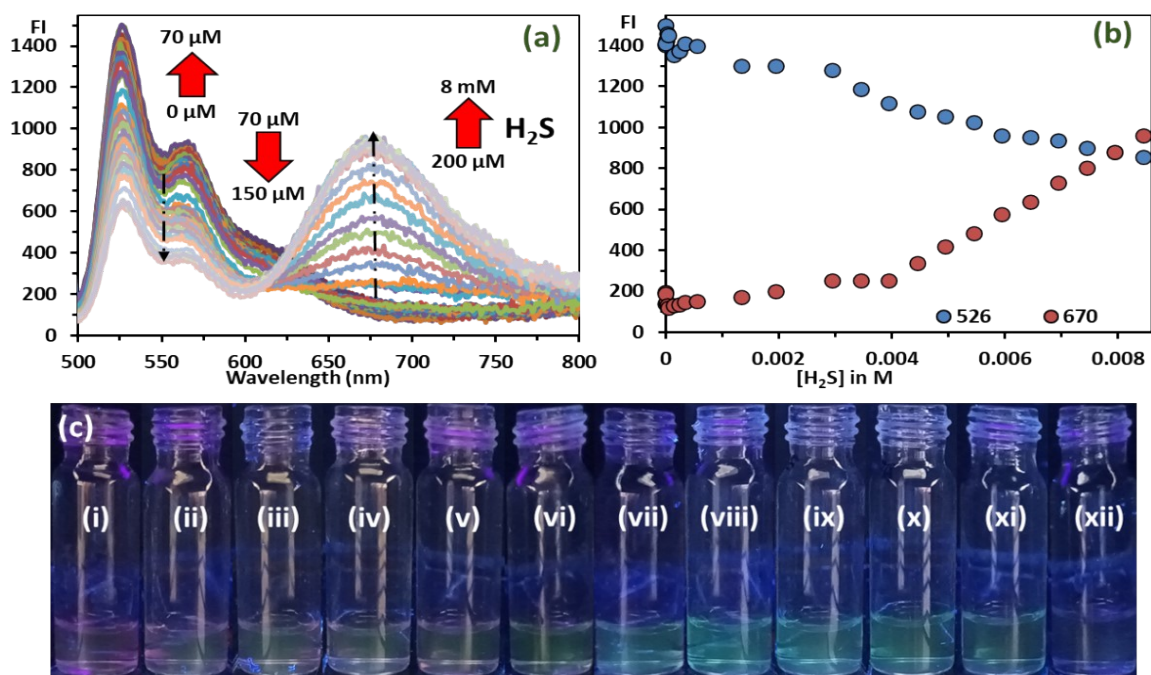

**Figure S11.** (a) Emission spectra of **DNP** (10  $\mu\text{M}$ ) recorded in HEPES buffer- $\text{CH}_3\text{CN}$  (1:1, v/v, pH 7.2) upon gradual addition of  $\text{H}_2\text{S}$ ; (b) Plot of fluorescence intensity of **DNP** (10  $\mu\text{M}$ ) upon addition of different concentrations of  $\text{H}_2\text{S}$ ; (c) The color change photographs of **DNP** under 365 nm UV illumination in the presence of different concentrations of  $\text{H}_2\text{S}$ ; labels in figure 2d (i) 0  $\mu\text{M}$  (i) 10  $\mu\text{M}$ , (ii) 20  $\mu\text{M}$ , (iii) 40  $\mu\text{M}$ , (iv) 60  $\mu\text{M}$ , (v) 80  $\mu\text{M}$ , (vi) 100  $\mu\text{M}$ , (vii) 120  $\mu\text{M}$ , (viii) 140  $\mu\text{M}$ , (ix) 160  $\mu\text{M}$ , (x) 180  $\mu\text{M}$ , (xi) 200  $\mu\text{M}$ , (xii) 220  $\mu\text{M}$ .

(iv) 70  $\mu\text{M}$ , (v) 100  $\mu\text{M}$ , (vi) 150  $\mu\text{M}$ , (vii) 200  $\mu\text{M}$ , (viii) 500  $\mu\text{M}$ , (ix) 750  $\mu\text{M}$ , (x) 2.45 mM, (xi) 4.45 mM, (xii) 8.75 mM concentrations of  $\text{H}_2\text{S}$ .

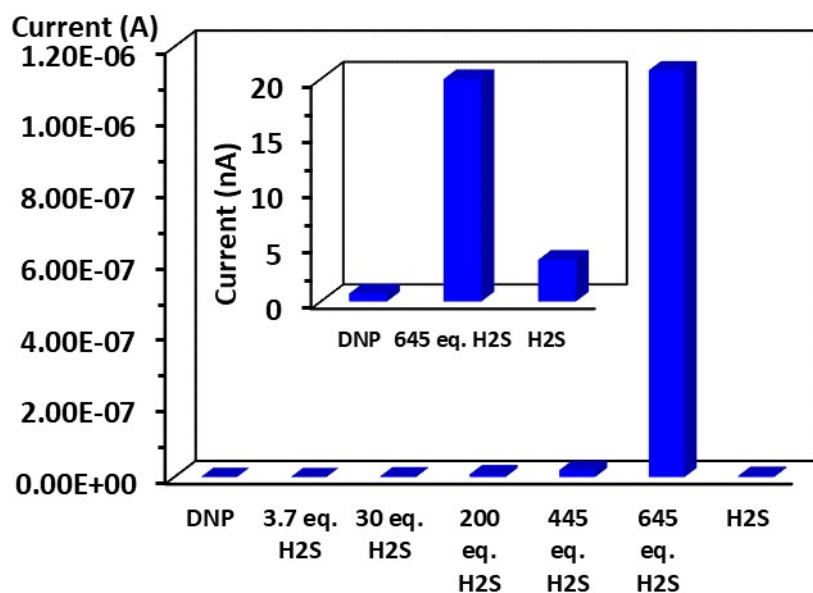

**Figure S12.** The bar graph for current values of **DNP** in air at different concentrations of  $\text{H}_2\text{S}$  from 37  $\mu\text{M}$  to 6.45 mM; (inset) plot to show the increment in current values at high concentration of  $\text{H}_2\text{S}$  in air at working temperature of 25  $^\circ\text{C}$  in comparison to  $\text{H}_2\text{S}$  itself; (inset) the magnified view for current values of **DNP**, **DNP**+645eq.  $\text{H}_2\text{S}$  and  $\text{H}_2\text{S}$  alone.

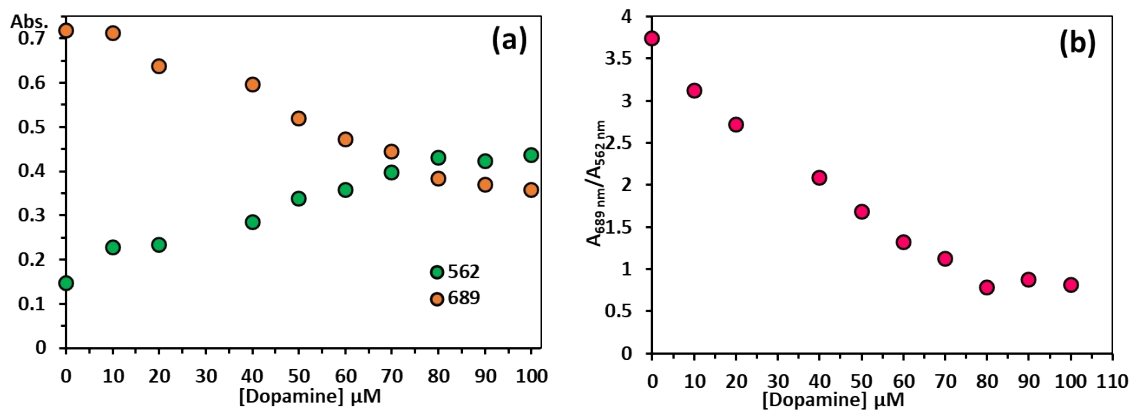

**Figure S13:** Plot of absorbance intensity of **DNP** (10  $\mu\text{M}$ ) (a) at 562 and 689 nm and (b) Ratiometric plot ( $A_{689\text{nm}}/A_{562\text{nm}}$ ) versus concentration of DA (0–100  $\mu\text{M}$ ) recorded in 50% HEPES buffer– $\text{CH}_3\text{CN}$  (pH 7.2) solution.

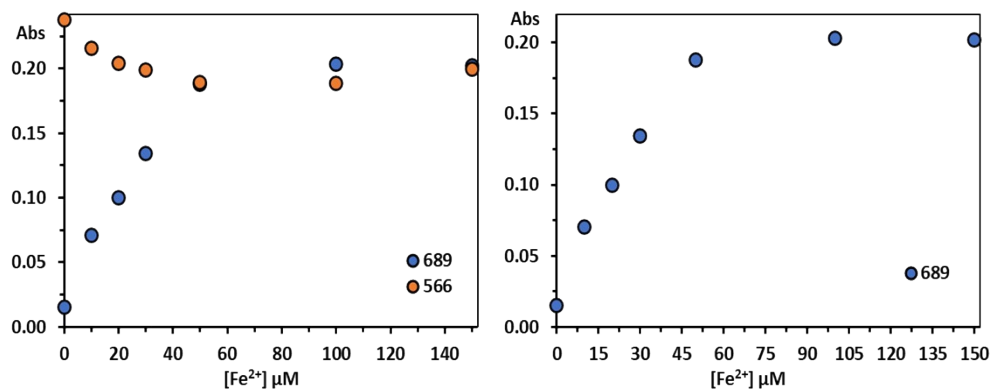

**Figure S14:** Plot of absorbance intensity of **DNB** (10  $\mu\text{M}$ ) (a) at 689 nm and 566 nm and (b) 689 nm upon addition of  $\text{Fe}^{2+}$  (0–150  $\mu\text{M}$ ) recorded in 50% HEPES buffer– $\text{CH}_3\text{CN}$  (pH 7.2) solution.

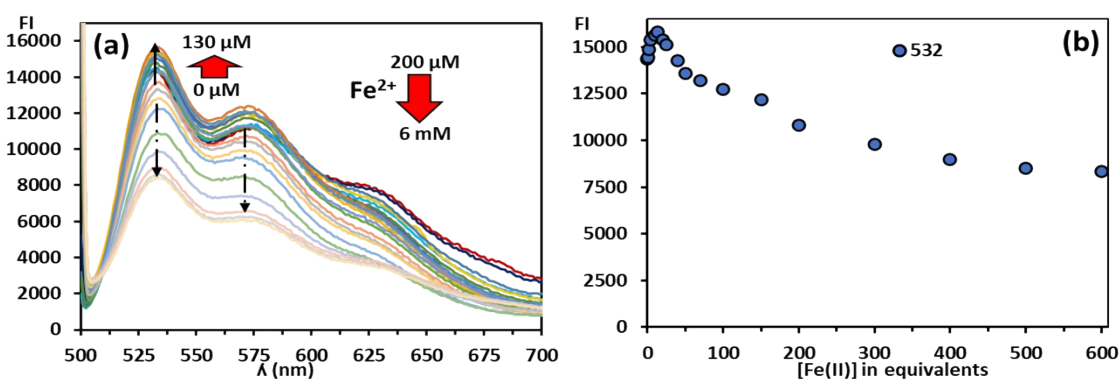

**Figure S15:** (a) Fluorescence spectra of **DNB** (10  $\mu\text{M}$ ) recorded in HEPES buffer– $\text{CH}_3\text{CN}$  (1:1, v/v, pH 7.2) upon adding different concentrations of  $\text{Fe}^{2+}$  ions; (b) Plot of emission intensity of **DNB** (10  $\mu\text{M}$ ) at 532 nm upon addition of (0–600 equivalents) concentration of  $\text{Fe}^{2+}$  solution.

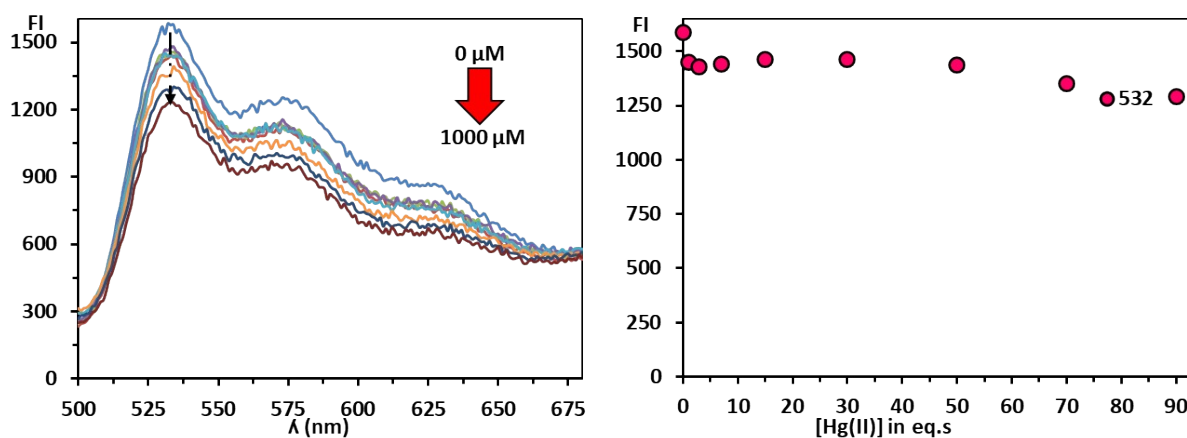

**Figure S16:** (a) Fluorescence spectra of **DNB** (10  $\mu\text{M}$ ) recorded in HEPES buffer– $\text{CH}_3\text{CN}$  (1:1, v/v, pH 7.2) upon adding different concentrations of  $\text{Hg}^{2+}$  ions; (b) Plot of emission intensity of **DNB** (10  $\mu\text{M}$ ) at 532 nm upon addition of (0–100 equivalents) concentration of  $\text{Hg}^{2+}$  solution.

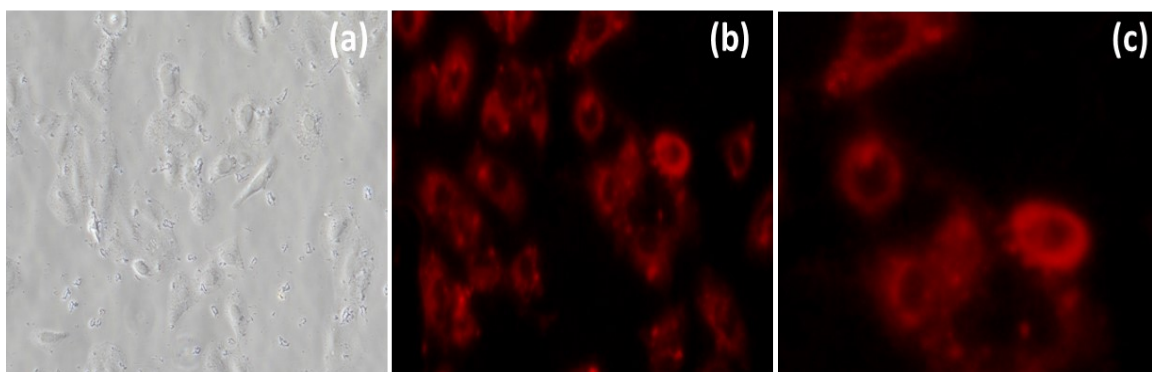

**Figure S17:** The Fluorescence imaging of Fe<sup>2+</sup> ions in A549 cells; (a) bright field images of A549 cells (b) DNP (20 μM) + Fe<sup>2+</sup> ions (700 μM); (c) Magnified view of cells shown in (b).
